# Supplementary material for: The Glucocorticoid Receptor NR3C1 in Testicular Peritubular Cells is Developmentally Regulated and Linked to the Smooth Muscle-Like Cellular Phenotype
Source: PubMed Central journal article supplement (PMC7230580; doi:10.3390/jcm9040961), 2020-03-31
Supplement: jcm-09-00961-s001.pdf [file jcm-09-00961-s001.pdf]

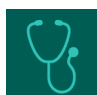

## The Glucocorticoid Receptor NR3C1 in Testicular Peritubular Cells is Developmentally Regulated and Linked to the Smooth Muscle-like Cellular Phenotype

Harald Welter<sup>1\*</sup>, Carola Herrmann<sup>1</sup>, Nils Dellweg<sup>1</sup>, Annika Missel<sup>1</sup>, Christiane Thanisch<sup>2</sup>, Henryk F. Urbanski<sup>3</sup>, Frank-Michael Köhn<sup>4</sup>, J. Ullrich Schwarzer<sup>5</sup>, Annette Müller-Taubenberger<sup>1</sup> and Artur Mayerhofer<sup>1\*</sup>

**Table S1.** Forward (For) and reverse (Rev) primer sequences (5'-3') employed in real time PCR, amplicon size, annealing temperature (A-Temp.), and source (accession number); n.a.: not applied in real time PCR.

| Gene Name                    | Sequence (5' - 3')                                         | Amplicon size (bp) | A-Temp. (°C) | Source (Accession Number) |
|------------------------------|------------------------------------------------------------|--------------------|--------------|---------------------------|
| <i>RPL19</i>                 | For AGGCACATGGGCATAGGTAA<br>Rev CCATGAGAATCCGCTTGTTT       | 199                | 59           | NM_000981.3               |
| <i>GR<math>\alpha</math></i> | For AGCCATTGTCAAGAGGGAAG<br>Rev AGCAATAGTTAAGGAGATTTTCAACC | 113                | n.a.         | NM_001018077              |
| <i>GR<math>\beta</math></i>  | For AGCCATTGTCAAGAGGGAAG<br>Rev TTTCTGGTTTAAACCACATAACATTT | 110                | n.a.         | NM_001020825              |
| <i>GR(NR3C1)</i>             | For GAAGGAAACTCCAGCCAGAA<br>Rev GATGATTTTCAGCTAACATCT      | 159                | 60           | NM_000176.3               |
| <i>ACTA2</i>                 | For ACCCAGTGTGGAGCAGCCC<br>Rev TTGTACACACCAAGGCAGT         | 110                | 62           | GU143396.1                |
| <i>ELN</i>                   | For CACTGGGGTATCCCATCAAG<br>Rev CCATAGCCATAGGGCAGTTT       | 85                 | 60           | NM_000501                 |
| <i>Col1</i>                  | For CACACGTCTCGGTTCATGGTA<br>Rev AAGAGGAAGGCCAAGTCGAG      | 91                 | 58           | NM_000088.3               |
| <i>Col3</i>                  | For GGTGGTTTTTCAGTTTAGCTACGG<br>Rev TGATGTTCTGGGAAGCTCGG   | 106                | 60           | NM_000090.3               |
| <i>FBLN5</i>                 | For CAATTTACAAGGGGGCTTCA<br>Rev GGGTTCTCAGCAGGACACAT       | 99                 | 59           | NM_006329.3               |
| <i>PDLIM1</i>                | For TCAAAGGCTGCACAGACAAC<br>Rev TATGGATGACGCTTCCCTTC       | 97                 | 60           | NM_002615                 |
| <i>FKBP5</i>                 | For GCATTATCCGGAGAACCAAA<br>Rev GCCACATCTTCGAGTCAAA        | 121                | 59           | NM_004117.3               |
| <i>FBN1</i>                  | For ATGTGAATGCTTCCCTGGAC<br>Rev GGCCTCTCTGTATCCACCA        | 98                 | 59           | NM_000138.5               |

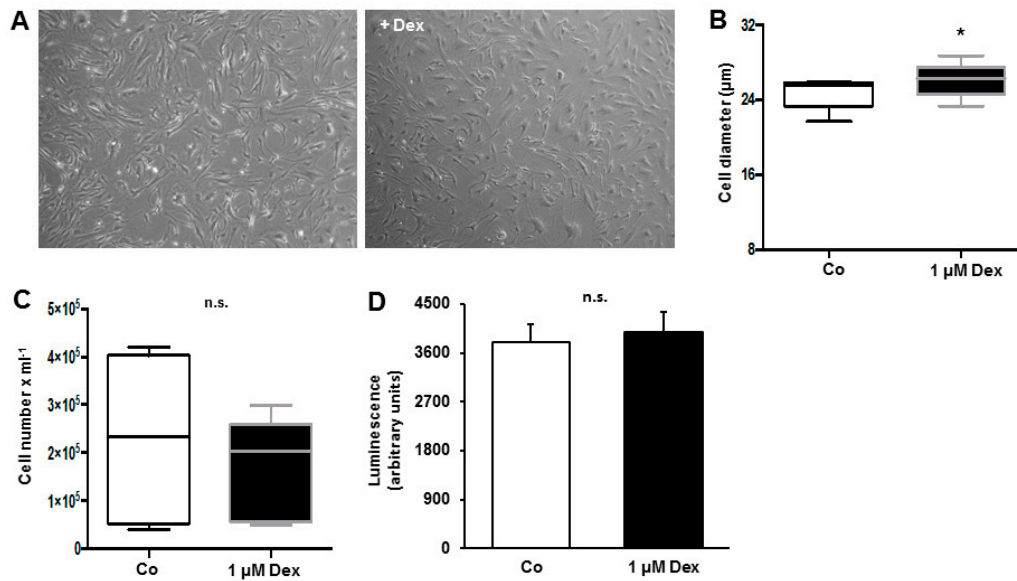

**Figure S1.** (A) Effect of a 72 hours incubation period with Dex (1 μM) compared to control (Basal, medium) on cell morphology (A, two representative pictures are shown), (B) cell diameter, (C) proliferation of HTPCs. (D) Cell viability of HTPCs as determined by an ATP assay after a 24 hours incubation period with Dex (1 μM); n = 3, with quintuplicates in each experimental group. Paired t-test, values are the mean ± SEM. Asterisk denotes statistical significance, \**p* < 0.05; n.s.: not significant;

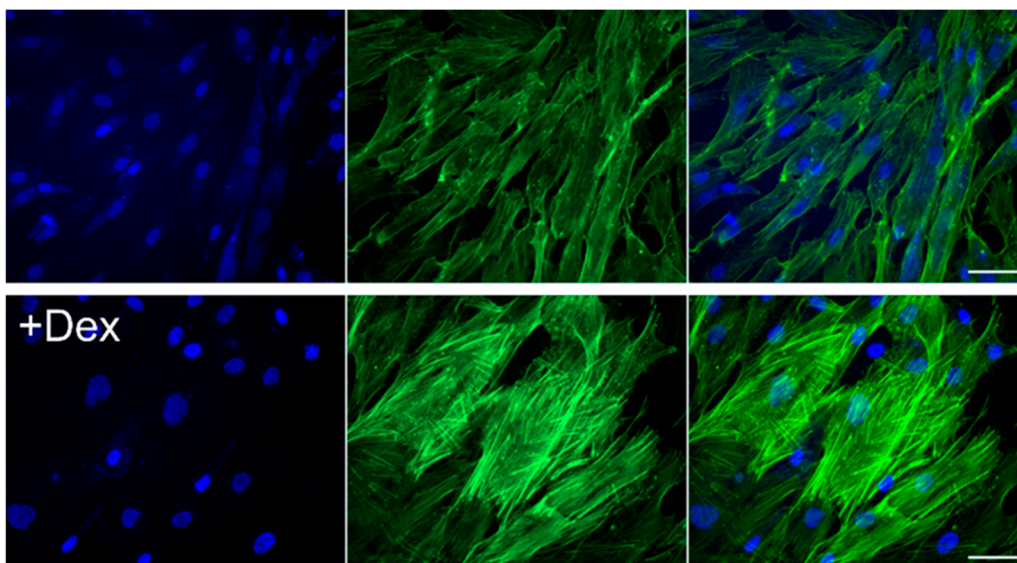

**Figure S2.** Fluorescence microscopy of control HTPCs (upper panel), and HTPCs derived from another patient line than the cells shown in Figure 5 treated with Dex (1 μM; lower panel) for 72 hours. Filamentous actin was visualized by staining with Atto 488-phalloidin (middle), and DNA with DAPI (left). Merged images are shown on the right. Scale bars = 50 μm;

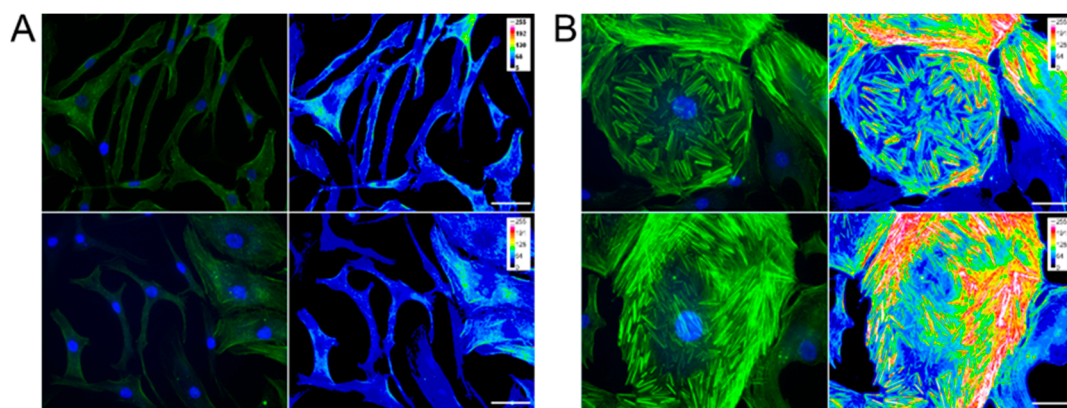

**Figure S3.** Semiquantitative analysis filamentous actin structures in HTPCs (A,B). Control HTPCs (A) were cultivated in parallel to cells treated with Dex (1  $\mu$ M) for 24 hours (B). The images were recorded with identical microscope settings, and two examples are shown for control (A), and Dex-treated cells (B). Left images depict the overlay of the green (filamentous actin visualized by staining with Atto 488-phalloidin) and blue channels (nuclei visualized by staining of DNA with DAPI). Images on the right indicate the intensity profiles depicted in the 16-color mode (Fiji) of grey values of the green (actin) channel. Scale bars = 50  $\mu$ m;
